# Supplementary material for: Re-testing as a method of implementing external quality assessment program for COVID-19 real time PCR testing in Uganda
Source: PLoS One. 2024 Jan 24;19(1):e0287272. doi: 10.1371/journal.pone.0287272 (PMC10807774; doi:10.1371/journal.pone.0287272)
Supplement: S1 Data — (XLSX) [file pone.0287272.s001.xlsx]

## Sheet: Sheet1
SAFARI LABORATORIES
POSITIVE SAMPLES SENT TO UVRI
COMPILED BY AMAOT DENISH (LAB TECHNOLOGIST)
DATE 30TH/AUGUST/2022
BARCODE	NATIONALITY		FAM	HEX	MRC/UVRI	NEGATIVE CONTROL		POSITIVE CONTROL
SL1234U	AMERICAN		19.45	24.14	27 (27)	NA		22.19
SL1340T	UGANDAN		19.07	21.6	32 (N)	NA		23.78
SL1252V	AUSTRALIAN		19.55	23.38	25 (28)	NA		20.79
SL1327C	DUTCH		18.51	24.48	24	NA		20.79
SL1226J	UGANDAN		27.38	22.56	14	NA		20.59
SL1241S	KOREAN		14.48	24.16	26 (27)	NA		21.37
SL1237W	AMERICAN		29.5	27.29	33 (N)	NA		22.19

## Sheet: Sheet2
CT VALUES OF SELECTED POSITIVE SAMPLES					Tenna & pHARMA Lab
SAMPLE ID		ORFlab gene		N-gene	Internal Control
AAI 504		22.01		22.4	23.15
AAI 362		34.01		32.08	35.09
AAI 520		32.24		35.73	29.75
AAI 523		37.14		38.51	31.39
AAI 822		25.33		22.35	24.56
AAI 823		20.14		18.95	28.6

## Sheet: Sheet3
The samples below have been sent to UVRI for gene sequencing
SERIAL NO	LAB NO	SEX	AGE	CT VALUES
				FAM	ROX	VIC	CY5	CONCLUSION
1	240	F	49	35.08	33.44	32.84	27.24	POSITIVE
2	88	M	27	28.53	25.84	27.17	26.42	POSITIVE
3	106	M	40	32.08	28.35	29.26	27.4	POSITIVE				MAIA Laboratory
4	72	F	80	35.16	33.73	34.13	26.35	POSITIVE
5	278	F	38	29.09	24.49	26.18	23.26	POSITIVE
6	212	M	55	34.21	37.01	37.78	26.43	POSITIVE
7	211	M	50	35.73	32.13	33.2	29.94	POSITIVE
8	652	F	47	34.53	30.43	32.15	29.81	POSITIVE
9	430	M	59	26.28	21.32	24.39	28	POSITIVE
10	109	M	5O	28.08	22.72	25.68	24.2	POSITIVE
SENDER NAME: MUTESI ANGELA						RECEIVER NAME: MASEMBE FREDRICK . J
SIGN						SIGN:

## Sheet: Sheet4
					UVRI CT value E gene (RPT)	UVRI CT value RdRp (RPT)
	C23-01-069	3373	MNRH	Nakiyemba Oliver	Negative (32)	Negative (N)
	C23-01-070	EQQ5	MNRH		Negative	Negative
	C23-01-071	EQQ14	MNRH		Negative	Negative
	C23-01-072	EQQ26	MNRH		Negative	Negative
	C23-01-073	EQQ27	MNRH		Negative	Negative
	C23-01-074	EQQ29	MNRH		Negative (30)	24 (N)
	C23-01-075	EQQ32	MNRH		Negative (34)	43 (N)
	C23-01-076	EQQ33	MNRH		Negative	Negative
	C23-01-077	EQQ36	MNRH		Negative	Negative
	C23-01-078	EQQ40	MNRH		Negative	Negative
	C23-01-079	EQQ54	MNRH		16 (21)	Negative (17)
	C23-01-080	EQQ55	MNRH		Negative (20)	Negative (22)
	C23-01-081	EQQ56	MNRH		15 (28)	Negative (N)
	C23-01-082	EQQ57	MNRH		Negative	Negative
	C23-01-083	EQQ58	MNRH		Negative (30)	26 (N)
	C23-01-084	EQQ59	MNRH		Negative	Negative
	C23-01-085	EQQ60	MNRH		Negative	Negative
	C23-01-086	EQQ61	MNRH		Negative	Negative
	C23-01-087	EQQ62	MNRH		Negative	Negative
	C23-01-088	EQQ63	MNRH		Negative	Negative
	C23-01-089	EQQ64	MNRH		Negative	Negative
	C23-01-090	EQQ65	MNRH		Negative	Negative
	C23-01-091	EQQ68	MNRH		Negative	Negative
	C23-01-092	EQQ69	MNRH		Negative	Negative
	C23-01-093	EQQ70	MNRH		Negative	Negative
	C23-01-094	EQQ71	MNRH		Negative	Negative
	C23-01-095	EQQ72	MNRH		Negative	Negative
	C23-01-096	EQQ73	MNRH		Negative	Negative
	C23-01-097	EQQ74	MNRH		Negative	Negative
	C23-01-098	EQQ76	MNRH		Negative	Negative
	C23-01-099	EQQ77	MNRH		32 (19)	Negative (24)
	C23-01-100	EQQ79	MNRH		Negative (26)	37 (27)
	C23-01-101	EQQ80	MNRH		Negative	Negative
	C23-01-102	EQQ82	MNRH		Negative	Negative
	C23-01-103	EQQ83	MNRH		Negative	Negative
	C23-01-104	EQQ84	MNRH		Negative (20)	12 (22)
	C23-01-105	EQQ85	MNRH		40	Negative
	C23-01-106	EQQ86	MNRH		Negative	Negative
	C23-01-107	EQQ88	MNRH		Negative	Negative
	C23-01-108	EQQ91	MNRH		Negative	Negative
	C23-01-109	EQQ93	MNRH		Negative	Negative
	C23-01-110	EQQ94	MNRH		Negative	Negative
	C23-01-111	EQQ95	MNRH		Negative	Negative
	C23-01-112	EQQ96	MNRH		Negative	Negative
	C23-01-113	EQQ98	MNRH		Negative	Negative
	C23-01-114	EQQ100	MNRH		Negative (N)	Negative (N)
	C23-01-115	EQQ103	MNRH		Negative (N)	Negative (N)
	C23-01-116	EQQ45	MNRH		Negative (34)	32 (N)

## Sheet: Sheet5
	s/n	ID		LAB	UVRI CT value E gene (RPT)	UVRI CT value RdRp (RPT)
	117	C23-01-117	240	MAIA		29	32	20.01.2023
	118	C23-01-118	88	MAIA		22	25	20.01.2023
	119	C23-01-119	106	MAIA		Negative	Negative	20.01.2023
	120	C23-01-120	72	MAIA		Negative (31)	31 (N)	20.01.2023
	121	C23-01-121	278	MAIA		21	26	20.01.2023
	122	C23-01-122	212	MAIA		37 (17)	Negative (N)	20.01.2023
	123	C23-01-123	211	MAIA		Negative	32	20.01.2023
	124	C23-01-124	652	MAIA		29 (31)	28 (32)	20.01.2023
	125	C23-01-125	430	MAIA		25	17	20.01.2023
	126	C23-01-126	109	MAIA		19	17	20.01.2023

## Sheet: Sheet6
						UVRI CT value E gene (RPT)	UVRI CT value RdRp (RPT)
	158	C23-01-158	MIH-AD2881	MEDIPAL HOSPITAL		30.25	32
	159	C23-01-159	MIH-AD3232	MEDIPAL HOSPITAL		26.819	28
	160	C23-01-160	MIH-AD3319	MEDIPAL HOSPITAL		26.233	27
	161	C23-01-161	MIH-AD3561	MEDIPAL HOSPITAL		22.386	30
	162	C23-01-162	MIH-AD3726	MEDIPAL HOSPITAL		23.153	24
	163	C23-01-163	MIH-AD3864	MEDIPAL HOSPITAL		22.706	24
	164	C23-01-164	MIH-AD4391	MEDIPAL HOSPITAL		29.509	31
	165	C23-01-165	MIH-AD4418	MEDIPAL HOSPITAL		21.803	23
	166	C23-01-166	MIH-AD4676	MEDIPAL HOSPITAL		28.994	30
	167	C23-01-167	MIH-AD4824	MEDIPAL HOSPITAL		21.588	24
	168	C23-01-168	MIH-AD4989	MEDIPAL HOSPITAL		30.585	31
	169	C23-01-169	MIH-AD5971	MEDIPAL HOSPITAL		28.601	30
	170	C23-01-172	MIH-AD2244	MEDIPAL HOSPITAL		20.957	24

## Sheet: Sheet7
	No.	Lab ID	Sample ID	UVRI CT (E gene)	UVRI CT (RdRp gene)	Gulu CT
	1	C23-02-003	GU09285	27.6	22.3	29.36
	2	C23-02-004	GU010241	31.9	33.5	28.34
	3	C23-02-005	GU010275	28.2	29.9	33.25
	4	C23-02-006	GU09402	Negative	Negative	18.79
	5	C23-02-007	GU010264	Negative	39.6	20.79
	6	C23-02-008	GU010274	20.5	23.8	30.33
	7	C23-02-009	GU010228	Negative	Negative	18.84
	8	C23-02-010	GU010239	Negative	Negative	28.27
	9	C23-02-011	GU010265	28.1	29.8	19.27
	10	C23-02-012	GU010253	21.3	22.9	17.36
